# Supplementary material
Source: HighWire-hosted journal article supplement (https://bmjopen.bmj.com/content/12/6/e060785)
Supplement: inline-supplementary-material-2 [file inline-supplementary-material-2.pdf]

**Supplementary Table S2.** Search strategy with EMBASE database as an example.

yellow terms = cost terms

green terms = strategy terms

olive terms = cost + strategy searches

blue terms = implementation terms (title position required)

grey terms = intervention terms

*Italics original EMBASE search (#32 replaced #3 in the original search)*

| No. | Query                                                                                                                                                                                                                                                                                                                                                                                                                                                                                                                                                                                                                                                                                                                                                                                                                                                                                                                                                                                                                                                                                                                                                                                                                                                                                                                                                                                                                                                                                                                                                                                                                                                                                                                                                                              | Results |
|-----|------------------------------------------------------------------------------------------------------------------------------------------------------------------------------------------------------------------------------------------------------------------------------------------------------------------------------------------------------------------------------------------------------------------------------------------------------------------------------------------------------------------------------------------------------------------------------------------------------------------------------------------------------------------------------------------------------------------------------------------------------------------------------------------------------------------------------------------------------------------------------------------------------------------------------------------------------------------------------------------------------------------------------------------------------------------------------------------------------------------------------------------------------------------------------------------------------------------------------------------------------------------------------------------------------------------------------------------------------------------------------------------------------------------------------------------------------------------------------------------------------------------------------------------------------------------------------------------------------------------------------------------------------------------------------------------------------------------------------------------------------------------------------------|---------|
| #42 | (#3 OR #4 OR #5 OR #6 OR #7 OR #8 OR #9 OR #10 OR #11 OR #12 OR #13 OR #14 OR #15 OR #16 OR #17 OR #18 OR #19 OR #20 OR #21 OR #22 OR #23 OR #24 OR #25 OR #26 OR #27 OR #28 OR #29) AND #41 AND #2 NOT (17456215:is OR 15517144:is) AND [english]/lim AND [2008-2020]/py NOT ('conference abstract'/it OR 'editorial'/it)                                                                                                                                                                                                                                                                                                                                                                                                                                                                                                                                                                                                                                                                                                                                                                                                                                                                                                                                                                                                                                                                                                                                                                                                                                                                                                                                                                                                                                                         | 3027    |
| #41 | implement*:ti OR initiate:ti OR initiating:ti OR initiated:ti OR introduc*:ti OR adopt*:ti OR uptake*:ti OR deploy*:ti OR disseminat*:ti OR diffus*:ti OR translat*:ti OR 'quality improvement':ti                                                                                                                                                                                                                                                                                                                                                                                                                                                                                                                                                                                                                                                                                                                                                                                                                                                                                                                                                                                                                                                                                                                                                                                                                                                                                                                                                                                                                                                                                                                                                                                 | 463928  |
| #32 | ((strateg* OR 'computer simulation*' OR 'walkthrough simulation' OR 'simulation exercise*' OR strateg* OR intervention* OR program* OR plan* OR process* OR model* OR framework* OR 'gather information' OR shadowing OR 'academic detailing' OR 'train the trainer' OR prepay* OR 'pre pay*' OR 'capitated payment*' OR 'pay for performance' OR 'plan do study act' OR 'define measure analyze improve control' OR 'formal commitment*' OR contract* OR 'written agreement*' OR 'sharing costs' OR 'cost sharing' OR staging OR stages OR 'scale up' OR phase* OR pilot OR 'demonstration project*' OR education* OR train* OR meeting* OR inservic* OR 'grand rounds' OR workshop* OR seminar* OR instruction* OR teach* OR module* OR tutorial* OR curricul* OR penaliz* OR penalis* OR penal* OR 'mass media' OR 'spread the word' OR newspaper* OR television OR tv OR radio* OR poster* OR billboard* OR adverti* OR restructur* OR relocat* OR 'quality management' OR audit* OR feedback* OR reminder* OR alert* OR 'advisory board*' OR workgroup* OR 'work group*' OR centraliz* OR centralis* OR 'technical assistance' OR 'tests of change' OR 'data warehousing' OR advisor* OR 'data expert*' OR strateg* OR 'team meetings') NEAR/5 (bankroll* OR 'bottom line' OR 'break even' OR budget* OR cash* OR charg* OR cheap* OR cost* OR disbursement* OR dollar* OR euro OR euros OR expenditur* OR expens* OR extravagant* OR fee OR fees OR inexpensive* OR 'in the green' OR 'in the red' OR money* OR 'out of pocket' OR outlay OR overhead* OR overpric* OR pay* OR paid OR price* OR prodigal* OR profligat* OR recompens* OR reimburs* OR remunerat* OR repay* OR roi OR 'return on investment' OR salar* OR spend* OR underwrit* OR underwrot* OR wages):ab,ti | 174470  |
| #29 | ((bankroll* OR 'bottom line' OR 'break even' OR budget* OR cash* OR charg* OR cheap* OR cost* OR disbursement* OR dollar* OR euro OR euros OR expenditur* OR expens* OR extravagant* OR fee OR fees OR inexpensive* OR 'in the green' OR 'in the red' OR money* OR 'out of pocket' OR outlay OR overhead* OR overpric* OR pay* OR paid OR price* OR prodigal* OR profligat* OR recompens* OR reimburs* OR remunerat* OR repay* OR roi OR 'return on investment' OR salar* OR spend* OR underwrit* OR underwrot* OR wages) NEAR/5 (centraliz* OR centralis* OR warehous*) NEAR/3 (data OR 'technical assistance')):ab,ti                                                                                                                                                                                                                                                                                                                                                                                                                                                                                                                                                                                                                                                                                                                                                                                                                                                                                                                                                                                                                                                                                                                                                            | 61      |
| #28 | ((bankroll* OR 'bottom line' OR 'break even' OR budget* OR cash* OR charg* OR cheap* OR cost* OR disbursement* OR dollar* OR euro OR euros OR expenditur* OR expens* OR extravagant* OR fee OR fees OR inexpensive* OR 'in the green' OR 'in the red' OR money* OR 'out of pocket' OR outlay OR overhead* OR overpric* OR pay* OR paid OR price* OR prodigal* OR profligat* OR recompens* OR reimburs* OR remunerat* OR repay* OR roi OR 'return on investment' OR salar* OR spend* OR underwrit* OR underwrot* OR wages) NEAR/5 (initiat* OR train* OR identif*) NEAR/3 leader*):ab,ti                                                                                                                                                                                                                                                                                                                                                                                                                                                                                                                                                                                                                                                                                                                                                                                                                                                                                                                                                                                                                                                                                                                                                                                            | 29      |

|     |                                                                                                                                                                                                                                                                                                                                                                                                                                                                                                                                                                                                                                                                                                                                                                                                                                                                                                                                              |      |
|-----|----------------------------------------------------------------------------------------------------------------------------------------------------------------------------------------------------------------------------------------------------------------------------------------------------------------------------------------------------------------------------------------------------------------------------------------------------------------------------------------------------------------------------------------------------------------------------------------------------------------------------------------------------------------------------------------------------------------------------------------------------------------------------------------------------------------------------------------------------------------------------------------------------------------------------------------------|------|
| #27 | ((bankroll* OR 'bottom line' OR 'break even' OR budget* OR cash* OR charg* OR cheap* OR cost* OR disbursement* OR dollar* OR euro OR euros OR expenditur* OR expens* OR extravagan* OR fee OR fees OR inexpensive* OR 'in the green' OR 'in the red' OR money* OR 'out of pocket' OR outlay OR overhead* OR overpric* OR pay* OR paid OR price* OR prodigal* OR profligat* OR recompens* OR reimburs* OR remunerat* OR repay* OR roi OR 'return on investment' OR salar* OR spend* OR underwrit* OR underwrot* OR wages) NEAR/5 (chang* OR alter* OR revis* OR restructur* OR new) NEAR/3 (role OR roles OR duties OR responsibilities OR location* OR site* OR structure* OR equipment* OR 'data collection' OR 'record system*' OR 'accreditation requirement*' OR 'membership requirement*' OR 'liability law*' OR 'credentialing standard*' OR 'licensure standard*' OR 'credentialing requirement*' OR 'licensure requirement*')):ab,ti | 1074 |
| #26 | ((bankroll* OR 'bottom line' OR 'break even' OR budget* OR cash* OR charg* OR cheap* OR cost* OR disbursement* OR dollar* OR euro OR euros OR expenditur* OR expens* OR extravagan* OR fee OR fees OR inexpensive* OR 'in the green' OR 'in the red' OR money* OR 'out of pocket' OR outlay OR overhead* OR overpric* OR pay* OR paid OR price* OR prodigal* OR profligat* OR recompens* OR reimburs* OR remunerat* OR repay* OR roi OR 'return on investment' OR salar* OR spend* OR underwrit* OR underwrot* OR wages) NEAR/5 (provid* OR offer* OR give OR gave OR given OR giving) NEAR/3 'financial support'):ab,ti                                                                                                                                                                                                                                                                                                                     | 15   |
| #25 | ((bankroll* OR 'bottom line' OR 'break even' OR budget* OR cash* OR charg* OR cheap* OR cost* OR disbursement* OR dollar* OR euro OR euros OR expenditur* OR expens* OR extravagan* OR fee OR fees OR inexpensive* OR 'in the green' OR 'in the red' OR money* OR 'out of pocket' OR outlay OR overhead* OR overpric* OR pay* OR paid OR price* OR prodigal* OR profligat* OR recompens* OR reimburs* OR remunerat* OR repay* OR roi OR 'return on investment' OR salar* OR spend* OR underwrit* OR underwrot* OR wages) NEAR/5 (ease OR easier OR facilitat* OR enabl*) NEAR/3 (access OR billing OR payment* OR communicat* OR 'data collection' OR 'data relay')):ab,ti                                                                                                                                                                                                                                                                   | 474  |
| #24 | ((bankroll* OR 'bottom line' OR 'break even' OR budget* OR cash* OR charg* OR cheap* OR cost* OR disbursement* OR dollar* OR euro OR euros OR expenditur* OR expens* OR extravagan* OR fee OR fees OR inexpensive* OR 'in the green' OR 'in the red' OR money* OR 'out of pocket' OR outlay OR overhead* OR overpric* OR pay* OR paid OR price* OR prodigal* OR profligat* OR recompens* OR reimburs* OR remunerat* OR repay* OR roi OR 'return on investment' OR salar* OR spend* OR underwrit* OR underwrot* OR wages) NEAR/5 (reduc* OR increas*) NEAR/3 ('consumer fee*' OR 'patient fee*')):ab,ti                                                                                                                                                                                                                                                                                                                                       | 15   |
| #23 | ((bankroll* OR 'bottom line' OR 'break even' OR budget* OR cash* OR charg* OR cheap* OR cost* OR disbursement* OR dollar* OR euro OR euros OR expenditur* OR expens* OR extravagan* OR fee OR fees OR inexpensive* OR 'in the green' OR 'in the red' OR money* OR 'out of pocket' OR outlay OR overhead* OR overpric* OR pay* OR paid OR price* OR prodigal* OR profligat* OR recompens* OR reimburs* OR remunerat* OR repay* OR roi OR 'return on investment' OR salar* OR spend* OR underwrit* OR underwrot* OR wages) NEAR/5 (pay* OR cover*) NEAR/3 'incremental cost*'):ab,ti                                                                                                                                                                                                                                                                                                                                                           | 132  |
| #22 | ((bankroll* OR 'bottom line' OR 'break even' OR budget* OR cash* OR charg* OR cheap* OR cost* OR disbursement* OR dollar* OR euro OR euros OR expenditur* OR expens* OR extravagan* OR fee OR fees OR inexpensive* OR 'in the green' OR 'in the red' OR money* OR 'out of pocket' OR outlay OR overhead* OR overpric* OR pay* OR paid OR price* OR prodigal* OR profligat* OR recompens* OR reimburs* OR remunerat* OR repay* OR roi OR 'return on investment' OR salar* OR spend* OR underwrit* OR underwrot* OR wages) NEAR/5 (rais* OR increas* OR influen*) NEAR/3 (demand* OR market*)):ab,ti                                                                                                                                                                                                                                                                                                                                           | 1243 |
| #21 | ((bankroll* OR 'bottom line' OR 'break even' OR budget* OR cash* OR charg* OR cheap* OR cost* OR disbursement* OR dollar* OR euro OR euros OR expenditur* OR expens* OR extravagan* OR fee OR fees OR inexpensive* OR 'in the green' OR 'in the red' OR money* OR 'out of pocket' OR outlay OR overhead* OR overpric* OR pay* OR paid OR price* OR prodigal* OR profligat* OR recompens* OR reimburs* OR remunerat* OR repay* OR roi OR 'return on investment' OR salar* OR spend* OR underwrit* OR underwrot* OR wages) NEAR/5 (shar* OR transfer* OR communicat* OR gather*) NEAR/5 (conduct* OR provid* OR provision OR teach* OR schedul* OR ongoing OR 'follow up' OR                                                                                                                                                                                                                                                                   | 16   |

|     |                                                                                                                                                                                                                                                                                                                                                                                                                                                                                                                                                                                                                                                                                                                                                                                                                                                                                                                                                                                                                                                                                                                                                                                                                                                                                           |       |
|-----|-------------------------------------------------------------------------------------------------------------------------------------------------------------------------------------------------------------------------------------------------------------------------------------------------------------------------------------------------------------------------------------------------------------------------------------------------------------------------------------------------------------------------------------------------------------------------------------------------------------------------------------------------------------------------------------------------------------------------------------------------------------------------------------------------------------------------------------------------------------------------------------------------------------------------------------------------------------------------------------------------------------------------------------------------------------------------------------------------------------------------------------------------------------------------------------------------------------------------------------------------------------------------------------------|-------|
|     | advanced OR booster* OR competenc* OR mastery OR vary OR varied OR interactive OR dynamic OR outreach OR visit* OR peer) NEAR/3 (training OR classes OR education* OR consultation));ab,ti                                                                                                                                                                                                                                                                                                                                                                                                                                                                                                                                                                                                                                                                                                                                                                                                                                                                                                                                                                                                                                                                                                |       |
| #20 | ((bankroll* OR 'bottom line' OR 'break even' OR budget* OR cash* OR charg* OR cheap* OR cost* OR disbursement* OR dollar* OR euro OR euros OR expenditur* OR expens* OR extravagant* OR fee OR fees OR inexpensive* OR 'in the green' OR 'in the red' OR money* OR 'out of pocket' OR outlay OR overhead* OR overpric* OR pay* OR paid OR price* OR prodigal* OR profligat* OR recompens* OR reimburs* OR remunerat* OR repay* OR roi OR 'return on investment' OR salar* OR spend* OR underwrit* OR underwrot* OR wages) NEAR/5 (shar* OR transfer* OR communicat* OR gather*) NEAR/3 (knowledg* OR training OR resources));ab,ti                                                                                                                                                                                                                                                                                                                                                                                                                                                                                                                                                                                                                                                        | 218   |
| #19 | ((bankroll* OR 'bottom line' OR 'break even' OR budget* OR cash* OR charg* OR cheap* OR cost* OR disbursement* OR dollar* OR euro OR euros OR expenditur* OR expens* OR extravagant* OR fee OR fees OR inexpensive* OR 'in the green' OR 'in the red' OR money* OR 'out of pocket' OR outlay OR overhead* OR overpric* OR pay* OR paid OR price* OR prodigal* OR profligat* OR recompens* OR reimburs* OR remunerat* OR repay* OR roi OR 'return on investment' OR salar* OR spend* OR underwrit* OR underwrot* OR wages) NEAR/5 (provid* OR provision OR offer*) NEAR/3 ('technical assistance' OR supervi*));ab,ti                                                                                                                                                                                                                                                                                                                                                                                                                                                                                                                                                                                                                                                                      | 44    |
| #18 | ((bankroll* OR 'bottom line' OR 'break even' OR budget* OR cash* OR charg* OR cheap* OR cost* OR disbursement* OR dollar* OR euro OR euros OR expenditur* OR expens* OR extravagant* OR fee OR fees OR inexpensive* OR 'in the green' OR 'in the red' OR money* OR 'out of pocket' OR outlay OR overhead* OR overpric* OR pay* OR paid OR price* OR prodigal* OR profligat* OR recompens* OR reimburs* OR remunerat* OR repay* OR roi OR 'return on investment' OR salar* OR spend* OR underwrit* OR underwrot* OR wages) NEAR/5 (creat* OR start*) NEAR/3 (purveyor* OR 'non profit OR nonprofit));ab,ti                                                                                                                                                                                                                                                                                                                                                                                                                                                                                                                                                                                                                                                                                 | 0     |
| #17 | ((bankroll* OR 'bottom line' OR 'break even' OR budget* OR cash* OR charg* OR cheap* OR cost* OR disbursement* OR dollar* OR euro OR euros OR expenditur* OR expens* OR extravagant* OR fee OR fees OR inexpensive* OR 'in the green' OR 'in the red' OR money* OR 'out of pocket' OR outlay OR overhead* OR overpric* OR pay* OR paid OR price* OR prodigal* OR profligat* OR recompens* OR reimburs* OR remunerat* OR repay* OR roi OR 'return on investment' OR salar* OR spend* OR underwrit* OR underwrot* OR wages) NEAR/5 (revis* OR chang* OR restructur* OR new* OR develop*) NEAR/3 (role* OR team* OR site* OR structur* OR equip* OR system* OR monitor* OR requir* OR accreditat* OR law OR liabilit* OR credential* OR licensure* OR standards));ab,ti                                                                                                                                                                                                                                                                                                                                                                                                                                                                                                                      | 5946  |
| #16 | ((bankroll* OR 'bottom line' OR 'break even' OR budget* OR cash* OR charg* OR cheap* OR cost* OR disbursement* OR dollar* OR euro OR euros OR expenditur* OR expens* OR extravagant* OR fee OR fees OR inexpensive* OR 'in the green' OR 'in the red' OR money* OR 'out of pocket' OR outlay OR overhead* OR overpric* OR pay* OR paid OR price* OR prodigal* OR profligat* OR recompens* OR reimburs* OR remunerat* OR repay* OR roi OR 'return on investment' OR salar* OR spend* OR underwrit* OR underwrot* OR wages) NEAR/5 (involv* OR identif* OR designat* OR cultivat* OR train* OR recruit* OR develop* OR influenc* OR educat* OR train* OR inform* OR meet* OR includ* OR inclus* OR inform* OR influenc* OR prepar* OR activat* OR engag* OR feedback* OR involv* OR 'work with' OR activat* OR remind* OR use OR utiliz* OR utilis*) NEAR/3 (stakeholder* OR executive* OR governing OR champion* OR patient* OR famil* OR consumer* OR communit* OR peer* OR leader* OR sponsor* OR manager* OR partner* OR relationship* OR universit* OR colleg* OR 'education institution*' OR organizations OR organisations OR 'groups of providers' OR coalition* OR collaborative* OR network* OR 'new teams' OR 'new clinical teams' OR 'advisory board*' OR 'work group*'));ab,ti | 15723 |
| #15 | ((bankroll* OR 'bottom line' OR 'break even' OR budget* OR cash* OR charg* OR cheap* OR cost* OR disbursement* OR dollar* OR euro OR euros OR expenditur* OR expens* OR extravagant* OR fee OR fees OR inexpensive* OR 'in the green' OR 'in the red' OR money* OR 'out of pocket' OR outlay OR overhead* OR overpric* OR pay* OR paid OR price* OR prodigal* OR profligat* OR recompens* OR reimburs* OR remunerat* OR repay* OR roi OR 'return on investment' OR salar* OR spend* OR underwrit* OR underwrot* OR wages) NEAR/5 (enourag* OR inspir* OR reward* OR facilitat* OR fund*) NEAR/3 (innovat* OR communicat* OR feedback* OR 'relay of data'));ab,ti                                                                                                                                                                                                                                                                                                                                                                                                                                                                                                                                                                                                                          | 126   |

|     |                                                                                                                                                                                                                                                                                                                                                                                                                                                                                                                                                                                                                                                                                                                                                                                                                                                                                              |      |
|-----|----------------------------------------------------------------------------------------------------------------------------------------------------------------------------------------------------------------------------------------------------------------------------------------------------------------------------------------------------------------------------------------------------------------------------------------------------------------------------------------------------------------------------------------------------------------------------------------------------------------------------------------------------------------------------------------------------------------------------------------------------------------------------------------------------------------------------------------------------------------------------------------------|------|
| #14 | ((bankroll* OR 'bottom line' OR 'break even' OR budget* OR cash* OR charg* OR cheap* OR cost* OR disbursement* OR dollar* OR euro OR euros OR expenditur* OR expens* OR extravagan* OR fee OR fees OR inexpensive* OR 'in the green' OR 'in the red' OR money* OR 'out of pocket' OR outlay OR overhead* OR overpric* OR pay* OR paid OR price* OR prodigal* OR profligat* OR recompens* OR reimburs* OR remunerat* OR repay* OR roi OR 'return on investment' OR salar* OR spend* OR underwrit* OR underwrot* OR wages) NEAR/5 pay* NEAR/3 perform*):ab,ti                                                                                                                                                                                                                                                                                                                                  | 3273 |
| #13 | ((bankroll* OR 'bottom line' OR 'break even' OR budget* OR cash* OR charg* OR cheap* OR cost* OR disbursement* OR dollar* OR euro OR euros OR expenditur* OR expens* OR extravagan* OR fee OR fees OR inexpensive* OR 'in the green' OR 'in the red' OR money* OR 'out of pocket' OR outlay OR overhead* OR overpric* OR pay* OR paid OR price* OR prodigal* OR profligat* OR recompens* OR reimburs* OR remunerat* OR repay* OR roi OR 'return on investment' OR salar* OR spend* OR underwrit* OR underwrot* OR wages) NEAR/5 (offer OR alter* OR utiliz* OR utilis* OR use OR using OR used OR uses) NEAR/3 (incentiv* OR reward* OR bonus* OR allowance* OR payment* OR 'loan forgiv*')):ab,ti                                                                                                                                                                                           | 3785 |
| #12 | ((bankroll* OR 'bottom line' OR 'break even' OR budget* OR cash* OR charg* OR cheap* OR cost* OR disbursement* OR dollar* OR euro OR euros OR expenditur* OR expens* OR extravagan* OR fee OR fees OR inexpensive* OR 'in the green' OR 'in the red' OR money* OR 'out of pocket' OR outlay OR overhead* OR overpric* OR pay* OR paid OR price* OR prodigal* OR profligat* OR recompens* OR reimburs* OR remunerat* OR repay* OR roi OR 'return on investment' OR salar* OR spend* OR underwrit* OR underwrot* OR wages) NEAR/5 (build* OR encourag* OR involv* OR discuss* OR communicat* OR 'network with' OR 'work with' OR cooperat* OR collaborat* OR form*) NEAR/3 ('buy in' OR consensus OR coalition* OR network*)):ab,ti                                                                                                                                                            | 269  |
| #11 | ((bankroll* OR 'bottom line' OR 'break even' OR budget* OR cash* OR charg* OR cheap* OR cost* OR disbursement* OR dollar* OR euro OR euros OR expenditur* OR expens* OR extravagan* OR fee OR fees OR inexpensive* OR 'in the green' OR 'in the red' OR money* OR 'out of pocket' OR outlay OR overhead* OR overpric* OR pay* OR paid OR price* OR prodigal* OR profligat* OR recompens* OR reimburs* OR remunerat* OR repay* OR roi OR 'return on investment' OR salar* OR spend* OR underwrit* OR underwrot* OR wages) NEAR/5 (model* OR simulat* OR mandat* OR requir* OR cyclical OR small OR gradual* OR incremental*) NEAR/3 (chang* OR implement* OR adopt* OR uptake* OR deploy*)):ab,ti                                                                                                                                                                                             | 1783 |
| #10 | ((bankroll* OR 'bottom line' OR 'break even' OR budget* OR cash* OR charg* OR cheap* OR cost* OR disbursement* OR dollar* OR euro OR euros OR expenditur* OR expens* OR extravagan* OR fee OR fees OR inexpensive* OR 'in the green' OR 'in the red' OR money* OR 'out of pocket' OR outlay OR overhead* OR overpric* OR pay* OR paid OR price* OR prodigal* OR profligat* OR recompens* OR reimburs* OR remunerat* OR repay* OR roi OR 'return on investment' OR salar* OR spend* OR underwrit* OR underwrot* OR wages) NEAR/5 (consultant* OR 'data expert*' OR advisor* OR technical assistance' OR 'technical support')):ab,ti                                                                                                                                                                                                                                                           | 1297 |
| #9  | ((bankroll* OR 'bottom line' OR 'break even' OR budget* OR cash* OR charg* OR cheap* OR cost* OR disbursement* OR dollar* OR euro OR euros OR expenditur* OR expens* OR extravagan* OR fee OR fees OR inexpensive* OR 'in the green' OR 'in the red' OR money* OR 'out of pocket' OR outlay OR overhead* OR overpric* OR pay* OR paid OR price* OR prodigal* OR profligat* OR recompens* OR reimburs* OR remunerat* OR repay* OR roi OR 'return on investment' OR salar* OR spend* OR underwrit* OR underwrot* OR wages) NEAR/5 (develop* OR distribut*) NEAR/3 (blueprint* OR plan* OR materials OR guideline* OR benchmark* OR 'report card*' OR measures OR algorithm* OR standards OR manual* OR tutorial* OR 'training module*' OR glossar* OR toolkit* OR tool OR tools OR poster* OR 'pocket card*' OR checklist* OR handout* OR brochur* OR glossary OR 'quality monitoring')):ab,ti | 1545 |

|    |                                                                                                                                                                                                                                                                                                                                                                                                                                                                                                                                                                                                                                                                                                                                                                                                                                                                                                                                                                                                                                                                                                                                                                                                                                                                                                                                                                                                                                                                                                                                                                      |        |
|----|----------------------------------------------------------------------------------------------------------------------------------------------------------------------------------------------------------------------------------------------------------------------------------------------------------------------------------------------------------------------------------------------------------------------------------------------------------------------------------------------------------------------------------------------------------------------------------------------------------------------------------------------------------------------------------------------------------------------------------------------------------------------------------------------------------------------------------------------------------------------------------------------------------------------------------------------------------------------------------------------------------------------------------------------------------------------------------------------------------------------------------------------------------------------------------------------------------------------------------------------------------------------------------------------------------------------------------------------------------------------------------------------------------------------------------------------------------------------------------------------------------------------------------------------------------------------|--------|
| #8 | ((bankroll* OR 'bottom line' OR 'break even' OR budget* OR cash* OR charg* OR cheap* OR cost* OR disbursement* OR dollar* OR euro OR euros OR expenditur* OR expens* OR extravagant* OR fee OR fees OR inexpensive* OR 'in the green' OR 'in the red' OR money* OR 'out of pocket' OR outlay OR overhead* OR overpric* OR pay* OR paid OR price* OR prodigal* OR profligat* OR recompens* OR reimburs* OR remunerat* OR repay* OR roi OR 'return on investment' OR salar* OR spend* OR underwrit* OR underwrot* OR wages) NEAR/5 visit* NEAR/3 (site* OR 'off site' OR successful* OR locat* OR institution*)):ab,ti                                                                                                                                                                                                                                                                                                                                                                                                                                                                                                                                                                                                                                                                                                                                                                                                                                                                                                                                                 | 88     |
| #7 | ((bankroll* OR 'bottom line' OR 'break even' OR budget* OR cash* OR charg* OR cheap* OR cost* OR disbursement* OR dollar* OR euro OR euros OR expenditur* OR expens* OR extravagant* OR fee OR fees OR inexpensive* OR 'in the green' OR 'in the red' OR money* OR 'out of pocket' OR outlay OR overhead* OR overpric* OR pay* OR paid OR price* OR prodigal* OR profligat* OR recompens* OR reimburs* OR remunerat* OR repay* OR roi OR 'return on investment' OR salar* OR spend* OR underwrit* OR underwrot* OR wages) NEAR/5 (identif* OR honor*) NEAR/3 (barrier* OR preferenc* OR champion*)):ab,ti                                                                                                                                                                                                                                                                                                                                                                                                                                                                                                                                                                                                                                                                                                                                                                                                                                                                                                                                                            | 195    |
| #6 | ((bankroll* OR 'bottom line' OR 'break even' OR budget* OR cash* OR charg* OR cheap* OR cost* OR disbursement* OR dollar* OR euro OR euros OR expenditur* OR expens* OR extravagant* OR fee OR fees OR inexpensive* OR 'in the green' OR 'in the red' OR money* OR 'out of pocket' OR outlay OR overhead* OR overpric* OR pay* OR paid OR price* OR prodigal* OR profligat* OR recompens* OR reimburs* OR remunerat* OR repay* OR roi OR 'return on investment' OR salar* OR spend* OR underwrit* OR underwrot* OR wages) NEAR/5 gather* NEAR/3 information):ab,ti                                                                                                                                                                                                                                                                                                                                                                                                                                                                                                                                                                                                                                                                                                                                                                                                                                                                                                                                                                                                   | 129    |
| #5 | ((bankroll* OR 'bottom line' OR 'break even' OR budget* OR cash* OR charg* OR cheap* OR cost* OR disbursement* OR dollar* OR euro OR euros OR expenditur* OR expens* OR extravagant* OR fee OR fees OR inexpensive* OR 'in the green' OR 'in the red' OR money* OR 'out of pocket' OR outlay OR overhead* OR overpric* OR pay* OR paid OR price* OR prodigal* OR profligat* OR recompens* OR reimburs* OR remunerat* OR repay* OR roi OR 'return on investment' OR salar* OR spend* OR underwrit* OR underwrot* OR wages) NEAR/5 (eliminat* OR address* OR overcom*) NEAR/3 barrier*):ab,ti                                                                                                                                                                                                                                                                                                                                                                                                                                                                                                                                                                                                                                                                                                                                                                                                                                                                                                                                                                          | 282    |
| #4 | ((bankroll* OR 'bottom line' OR 'break even' OR budget* OR cash* OR charg* OR cheap* OR cost* OR disbursement* OR dollar* OR euro OR euros OR expenditur* OR expens* OR extravagant* OR fee OR fees OR inexpensive* OR 'in the green' OR 'in the red' OR money* OR 'out of pocket' OR outlay OR overhead* OR overpric* OR pay* OR paid OR price* OR prodigal* OR profligat* OR recompens* OR reimburs* OR remunerat* OR repay* OR roi OR 'return on investment' OR salar* OR spend* OR underwrit* OR underwrot* OR wages) NEAR/5 (assess* OR identif* OR study*) NEAR/3 (needs OR readiness OR barrier* OR impediment* OR strength* OR 'local context' OR 'community support' OR attitud* OR belief* OR climat* OR cultur* OR structur* OR 'organizational structure' OR preferenc* OR 'policy context' OR 'local policies' OR 'local policy')):ab,ti                                                                                                                                                                                                                                                                                                                                                                                                                                                                                                                                                                                                                                                                                                                | 1061   |
| #3 | ((implement* OR initiate OR initiating OR initiated OR introduc* OR adopt* OR uptake* OR deploy* OR disseminat* OR diffus* OR translat* OR strateg* OR 'computer simulation*' OR 'walkthrough simulation' OR 'simulation exercise*' OR strateg* OR intervention* OR program* OR plan* OR process* OR model* OR framework* OR 'gather information' OR shadowing OR 'academic detailing' OR 'train the trainer' OR prepay* OR 'pre pay*' OR 'capitated payment*' OR 'pay for performance' OR 'plan do study act' OR 'define measure analyze improve control' OR 'formal commitment*' OR contract* OR 'written agreement*' OR 'sharing costs' OR 'cost sharing' OR staging OR stages OR 'scale up' OR phase* OR pilot OR 'demonstration project*' OR education* OR train* OR meeting* OR inservic* OR 'grand rounds' OR workshop* OR seminar* OR instruction* OR teach* OR module* OR tutorial* OR curricul* OR penaliz* OR penaliz* OR penalt* OR 'mass media' OR 'spread the word' OR newspaper* OR television OR tv OR radio* OR poster* OR billboard* OR adverti* OR restructur* OR relocat* OR 'quality management' OR audit* OR feedback* OR reminder* OR alert* OR 'advisory board*' OR workgroup* OR 'work group*' OR centraliz* OR centraliz* OR 'technical assistance' OR 'tests of change' OR 'data warehousing' OR advisor* OR 'data expert*' OR strateg* OR 'team meetings') NEAR/5 (bankroll* OR 'bottom line' OR 'break even' OR budget* OR cash* OR charg* OR cheap* OR cost* OR disbursement* OR dollar* OR euro OR euros OR expenditur* OR expens* OR | 200128 |

|    |                                                                                                                                                                                                                                                                                                                                                         |         |
|----|---------------------------------------------------------------------------------------------------------------------------------------------------------------------------------------------------------------------------------------------------------------------------------------------------------------------------------------------------------|---------|
|    | extravagan* OR fee OR fees OR inexpensive* OR 'in the green' OR 'in the red' OR money* OR 'out of pocket' OR outlay OR overhead* OR overpric* OR pay* OR paid OR price* OR prodigal* OR profligat* OR recompens* OR reimburs* OR remunerat* OR repay* OR roi OR 'return on investment' OR salar* OR spend* OR underwrit* OR underwrot* OR wages)):ab,ti |         |
| #2 | interven*:ab,ti OR guideline*:ab,ti OR evidence*:ab,ti OR bundle*:ab,ti OR protocol*:ab,ti OR algorithm*:ab,ti OR program*:ab,ti OR project:ab,ti OR projects:ab,ti OR policy:ab,ti OR policies:ab,ti OR initiativ*:ab,ti                                                                                                                               | 5615543 |

**Note.** The searches, which were not essential to the final search, were exclude, for example #1 omitted because it was not used in any of the subsequent searches. The later search lines (#33 to #40) that were omitted were lines involving step by step addition of limits, concepts, etc.
