# Supplementary material
Source: HighWire-hosted journal article supplement (https://bmjopen.bmj.com/content/12/6/e060785)
Supplement: inline-supplementary-material-3 [file inline-supplementary-material-3.pdf]

**Supplementary Table S3.** Numbers of dissemination and implementation strategies by outcome classifications [24].

| Study/classification     | Dissemination | Implementation process | Integration | Capacity-building | Scale-up | No. of strategies per study | No. of classification per study |
|--------------------------|---------------|------------------------|-------------|-------------------|----------|-----------------------------|---------------------------------|
| Afshar, 2019 [51]        | 1             | 2                      | 1           |                   | 1        | 5                           | 4                               |
| Becker, 2012 [75]        |               |                        |             |                   | 1        | 1                           | 1                               |
| Broughton, 2013* [65]    | 1             |                        |             |                   | 3        | 4                           | 2                               |
| Broughton, 2018 [36]     | 1             |                        |             |                   | 2        | 3                           | 2                               |
| Calo, 2018 [88]          |               |                        |             |                   | 1        | 1                           | 1                               |
| Chandrashekar, 2019 [40] | 1             |                        |             |                   |          | 1                           | 1                               |
| Chang, 2016 [55]         |               | 1                      |             |                   | 1        | 2                           | 2                               |
| Chung, 2018 [37]         |               |                        |             | 1                 | 1        | 2                           | 2                               |
| Claes, 2010 [76]         |               | 1                      |             |                   | 1        | 2                           | 2                               |
| Dalaba, 2014 [77]        |               |                        |             |                   | 1        | 1                           | 1                               |
| Dik, 2015 [90]           |               | 1                      |             |                   |          | 1                           | 1                               |
| Dirks, 2012 [93]         |               |                        |             | 1                 |          | 1                           | 1                               |
| Dopp, 2017 [41]          |               |                        |             | 1                 |          | 1                           | 1                               |
| Doran, 2016 [50]         |               |                        |             |                   | 1        | 1                           | 1                               |
| Edwards, 2016 [49]       |               |                        |             | 1                 | 1        | 2                           | 2                               |
| Emery, 2018 [92]         | 1             |                        |             |                   |          | 1                           | 1                               |
| Engel, 2014 [86]         |               | 1                      |             |                   | 1        | 2                           | 2                               |
| Fortney, 2014 [56]       |               | 1                      |             |                   | 1        | 2                           | 2                               |
| Freedman, 2017 [48]      |               |                        |             |                   | 1        | 1                           | 1                               |
| Galactionova, 2015 [28]  | 2             |                        | 1           |                   | 2        | 5                           | 3                               |
| Galaviz, 2017* [29]      |               | 1                      |             |                   | 1        | 2                           | 2                               |
| Garner, 2018 [34]        |               |                        |             |                   | 2        | 2                           | 1                               |
| Gilkey, 2014 [42]        |               |                        |             |                   | 1        | 1                           | 1                               |
| Green, 2017 [53]         | 1             |                        |             |                   |          | 1                           | 1                               |
| Griffiths, 2016 [69]     |               |                        | 1           |                   | 1        | 2                           | 2                               |
| Hansen, 2017 [32]        |               |                        |             |                   | 3        | 3                           | 1                               |
| Hiscock, 2019 [39]       |               |                        |             |                   | 1        | 1                           | 1                               |
| Hoefl, 2019 [54]         |               | 1                      |             |                   | 1        | 2                           | 2                               |
| Howson, 2018 [78]        |               |                        |             |                   | 1        | 1                           | 1                               |
| Ibrahim, 2018 [44]       | 1             | 2                      |             |                   | 1        | 4                           | 3                               |
| James, 2017 [79]         |               |                        |             |                   | 1        | 1                           | 1                               |
| Jensen, 2017 [89]        |               |                        | 1           |                   | 2        | 3                           | 2                               |
| Jordan, 2019 [80]        |               | 1                      |             |                   | 1        | 2                           | 2                               |
| Krukowski, 2013 [27]     | 1             |                        |             |                   | 1        | 2                           | 2                               |
| Kyabayinze, 2012 [81]    |               |                        |             |                   | 1        | 1                           | 1                               |
| Lara, 2018 [57]          |               | 2                      | 1           |                   |          | 3                           | 2                               |
| Liu, 2009* [82]          | 1             | 1                      | 1           |                   | 2        | 5                           | 4                               |
| Moessner, 2016 [35]      | 2             | 2                      |             |                   | 1        | 5                           | 3                               |
| Mortimer, 2018* [30]     | 1             | 1                      |             | 1                 | 2        | 5                           | 4                               |
| Mortimer, 2013 [33]      | 1             |                        |             |                   | 3        | 4                           | 2                               |
| Njau, 2008 [83]          | 1             |                        | 1           |                   | 1        | 3                           | 3                               |
| Perraudin, 2019 [84]     | 1             | 1                      |             |                   | 1        | 3                           | 3                               |
| Quanbeck, 2018 [91]      |               | 1                      |             |                   | 2        | 3                           | 2                               |
| Quinn, 2016 [45]         |               |                        |             |                   | 2        | 2                           | 1                               |
| Reilly, 2018 [47]        |               | 2                      |             |                   | 2        | 4                           | 2                               |

|                                               |          |          |         |         |          |   |   |
|-----------------------------------------------|----------|----------|---------|---------|----------|---|---|
| Ritchie, 2019 [43]                            |          |          |         |         | 1        | 1 | 1 |
| Romney, 2014 [38]                             |          | 1        |         |         | 2        | 3 | 2 |
| Sadasivam, 2013 [58]                          | 1        |          |         |         | 1        | 2 | 2 |
| Sari, 2017 [85]                               | 1        |          |         |         | 2        | 3 | 2 |
| Shelley, 2015 [46]                            |          |          |         |         | 2        | 2 | 1 |
| Soi, 2019 [87]                                | 1        |          | 1       |         |          | 2 | 2 |
| Stults, 2016 [52]                             | 1        |          |         |         | 3        | 4 | 2 |
| Number (%) of studies within classification   | 19 (37%) | 18 (35%) | 8 (15%) | 5 (10%) | 44 (85%) |   |   |
| Total number of strategies per classification | 21       | 23       | 8       | 5       | 64       |   |   |
